# Supplementary material for: Observationally constrained analysis on the distribution of fine- and coarse-mode nitrate in global models
Source: Copernicus journal article supplement (doi:10.5194/acp-25-10049-2025), 2025-09-09
Supplement: Supplementary file 1 [file acp-25-10049-2025-supplement.pdf]

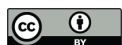

*Supplement of*

## **Observationally constrained analysis on the distribution of fine- and coarse-mode nitrate in global models**

**Mingxuan Wu et al.**

*Correspondence to:* Mingxuan Wu (mingxuan.wu@pnnl.gov) and Hailong Wang (hailong.wang@pnnl.gov)

The copyright of individual parts of the supplement might differ from the article licence.

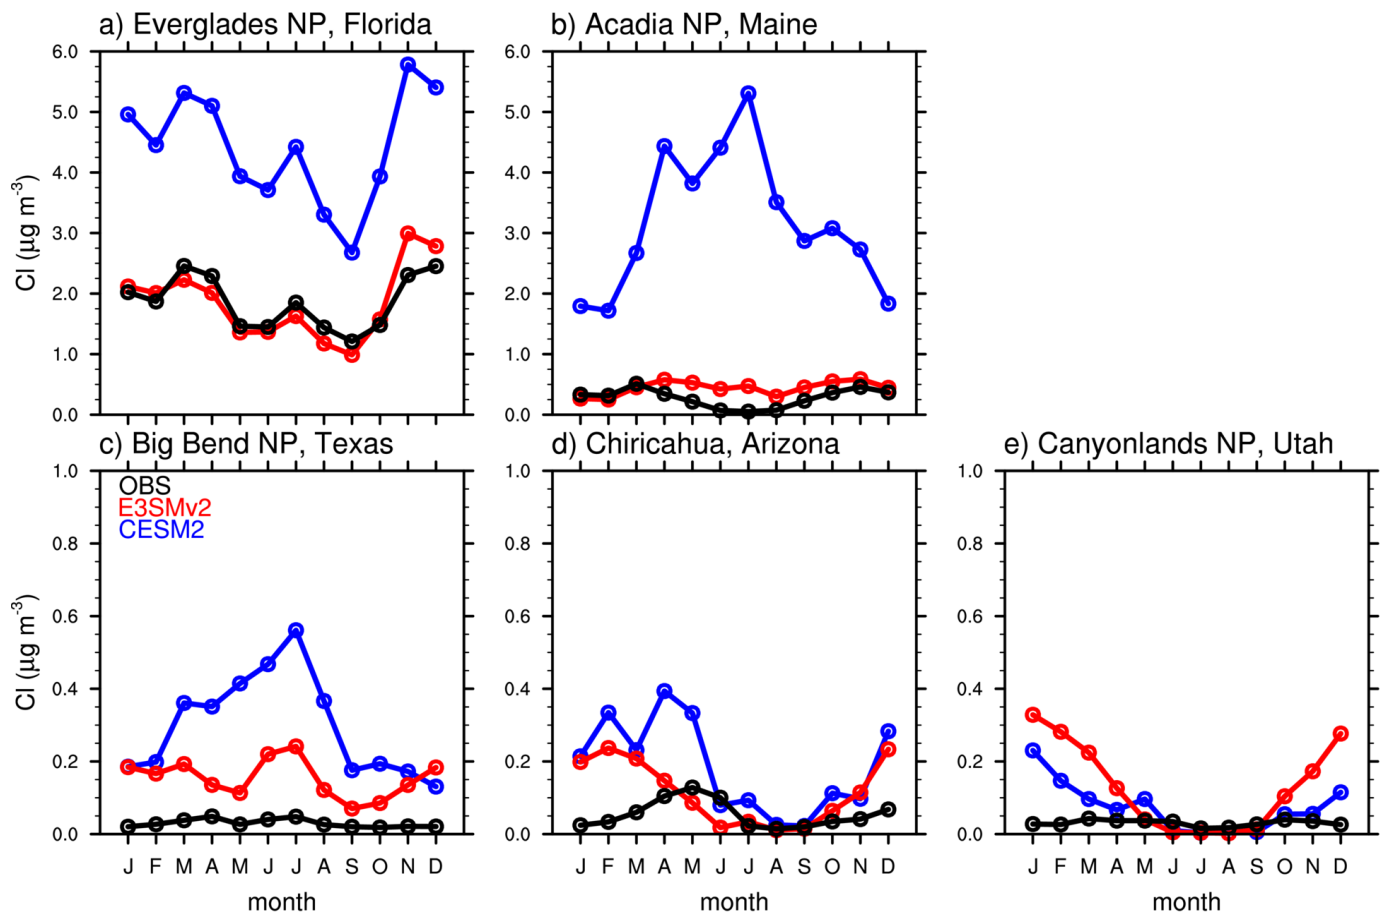

**Figure S1.** Same as Figure 7 but for chlorine surface concentrations ( $\mu\text{g m}^{-3}$ ). Observations are not available at Virgin Island.

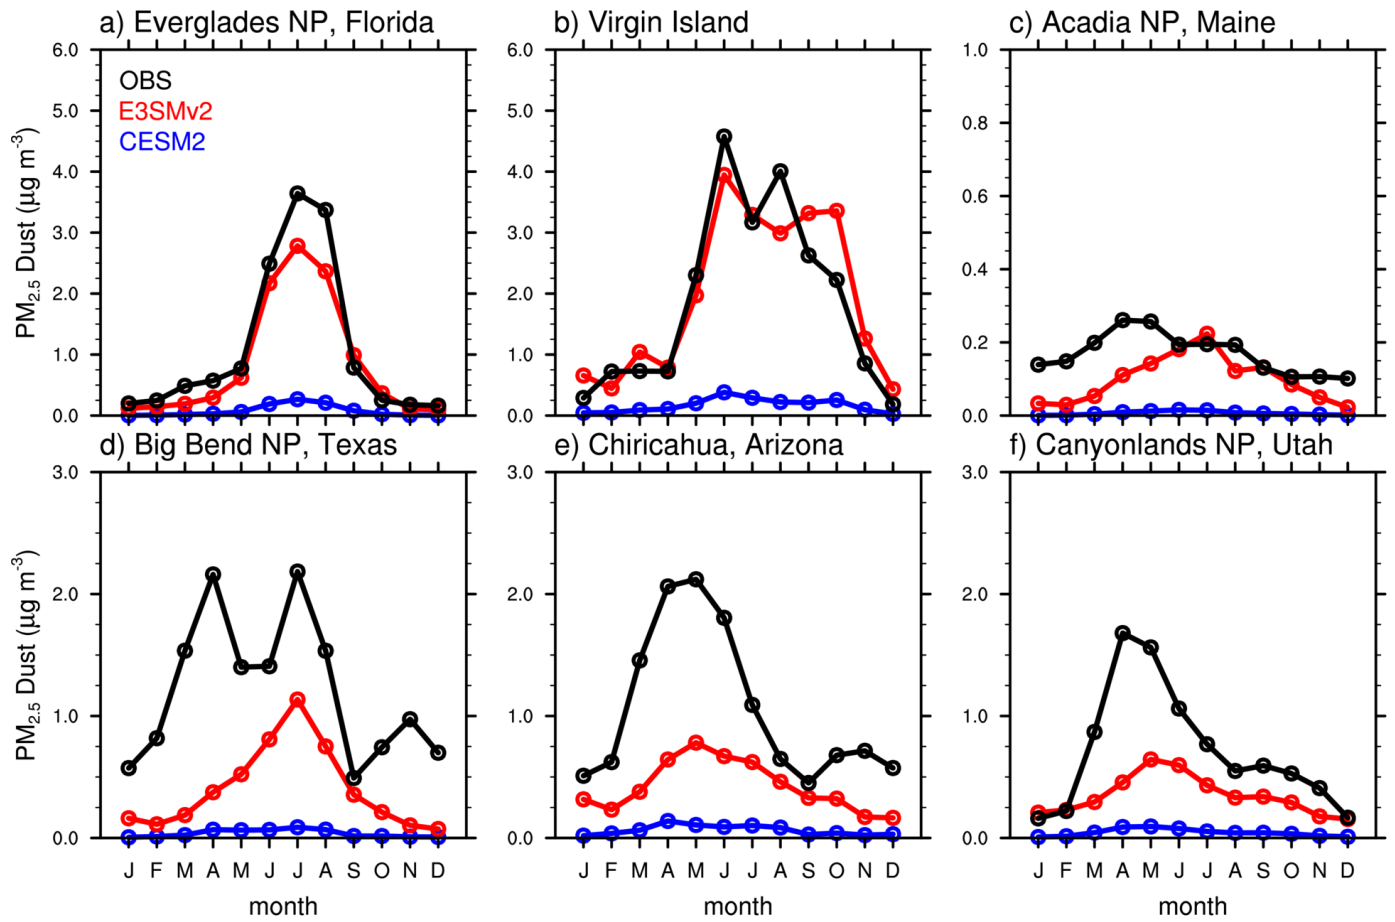

**Figure S2.** Same as Figure 7 but for PM<sub>2.5</sub> dust surface concentrations (μg m<sup>-3</sup>).

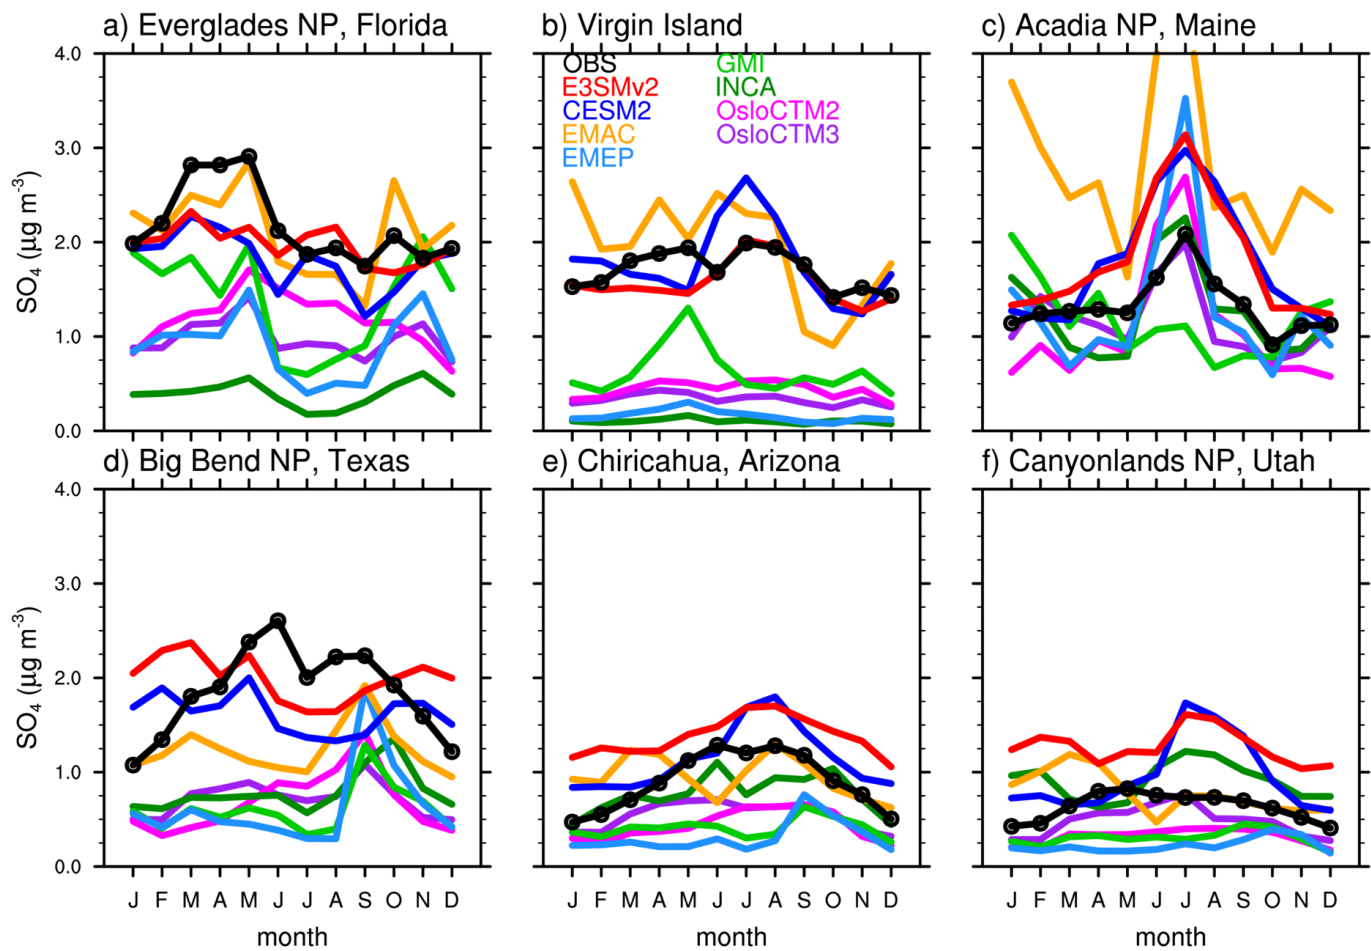

**Figure S3.** Same as Figure 7 but for sulfate surface concentrations ( $\mu\text{g m}^{-3}$ ).

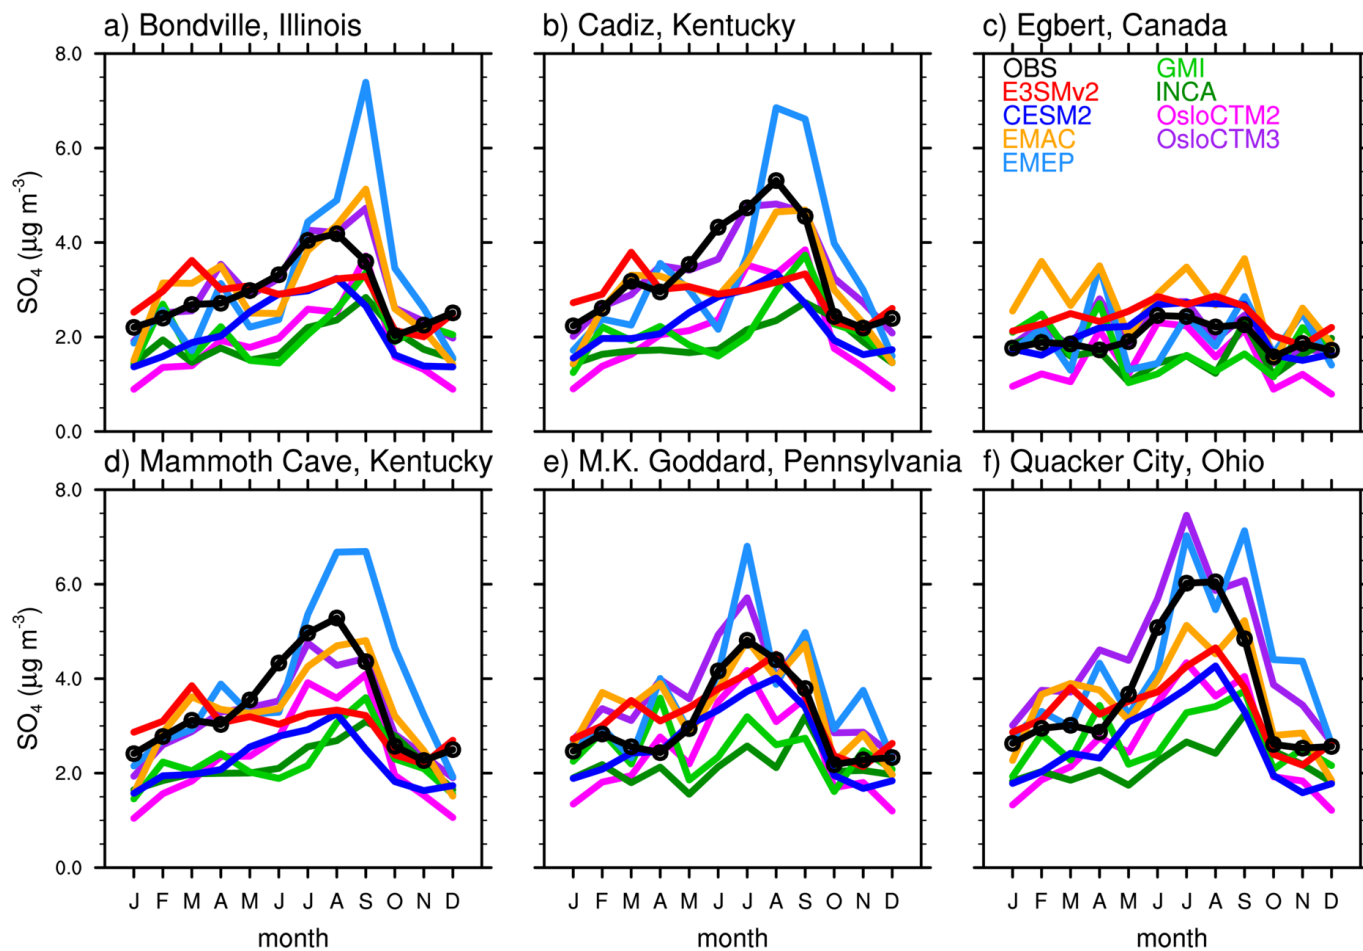

58

59 **Figure S4.** Same as Figure 8 but for sulfate surface concentrations ( $\mu\text{g m}^{-3}$ ).

60

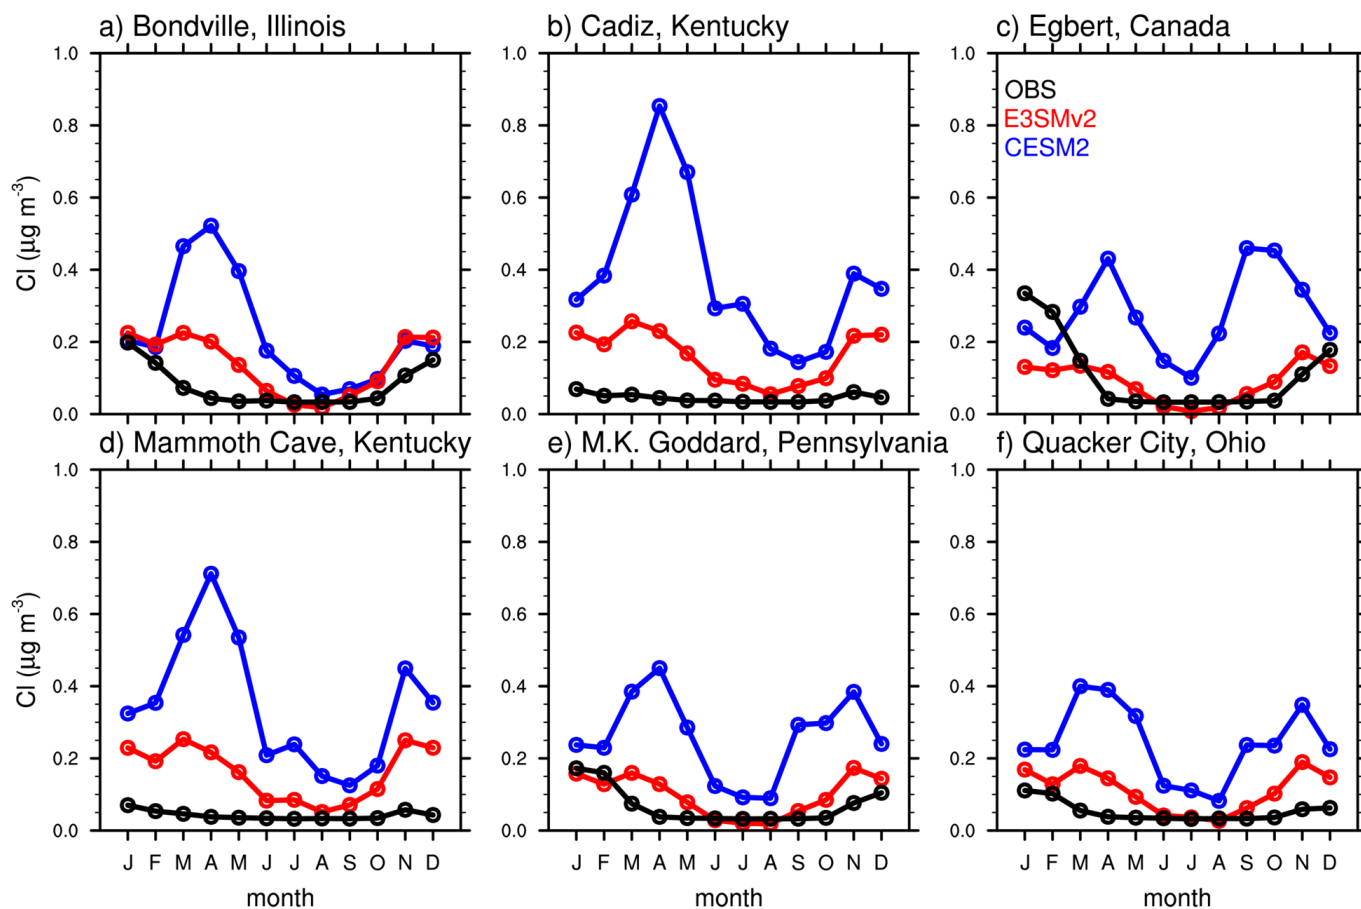

**Figure S5.** Same as Figure 8 but for chlorine surface concentrations ( $\mu\text{g m}^{-3}$ ).

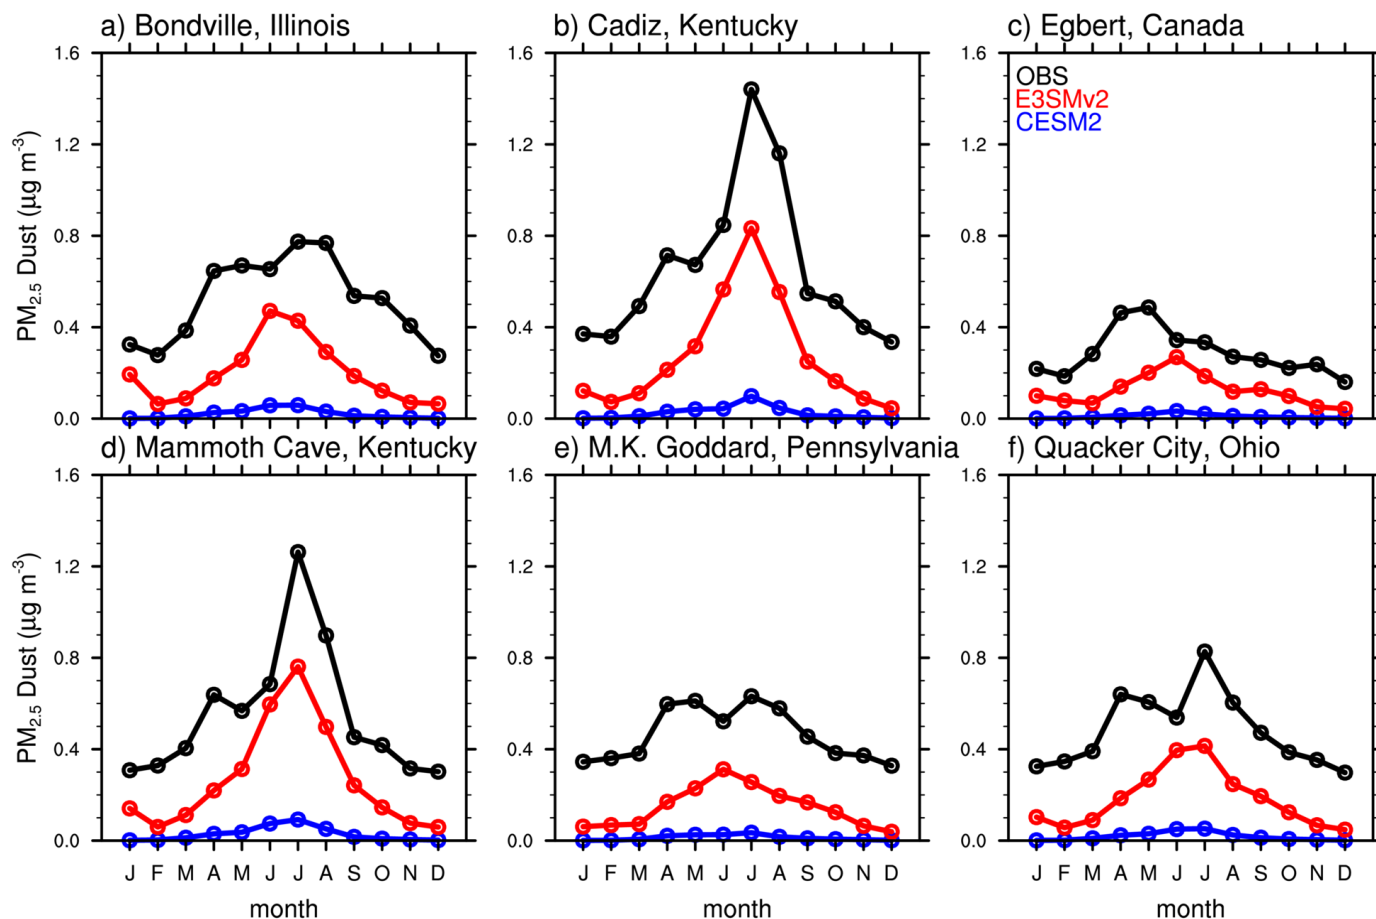

**Figure S6.** Same as Figure 8 but for PM<sub>2.5</sub> dust surface concentrations (μg m<sup>-3</sup>).

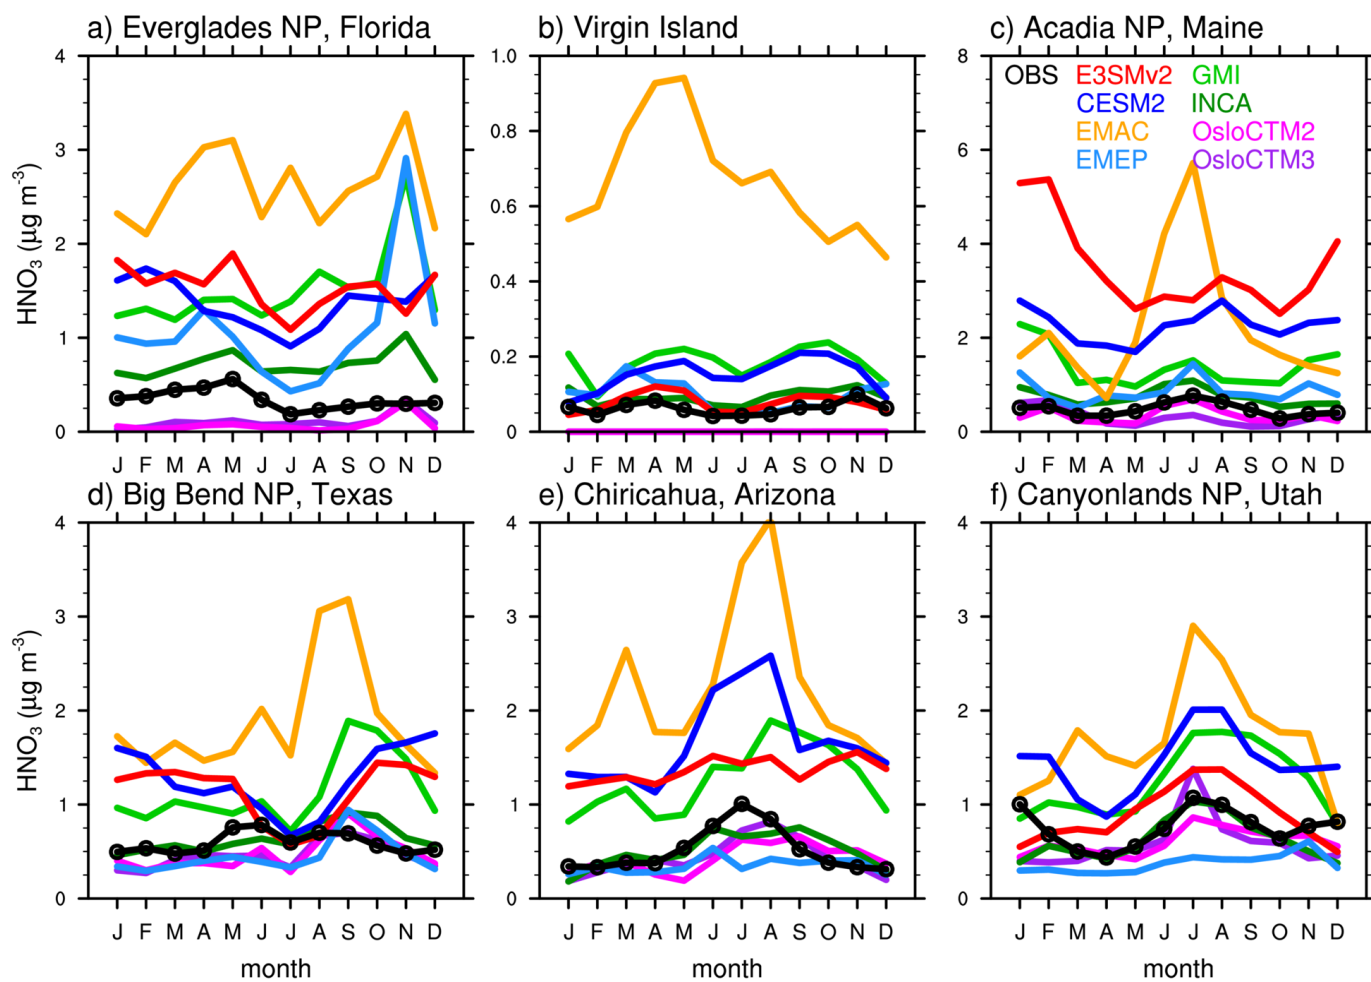

**Figure S7.** Same as Figure 7 but for HNO<sub>3</sub> surface concentrations (μg m<sup>-3</sup>).



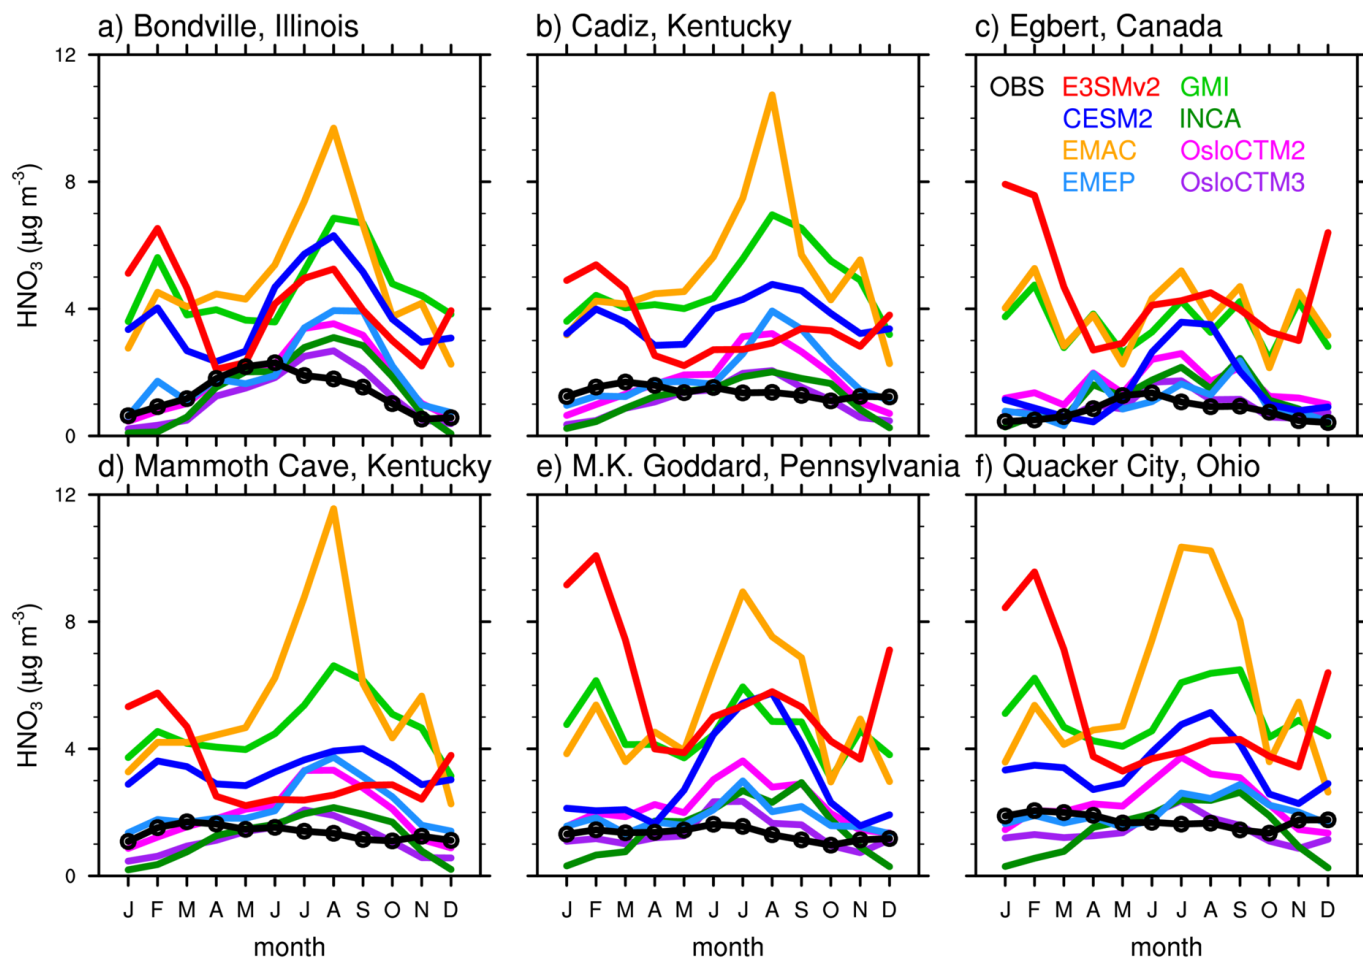

**Figure S8.** Same as Figure 8 but for HNO<sub>3</sub> surface concentrations (μg m<sup>-3</sup>).

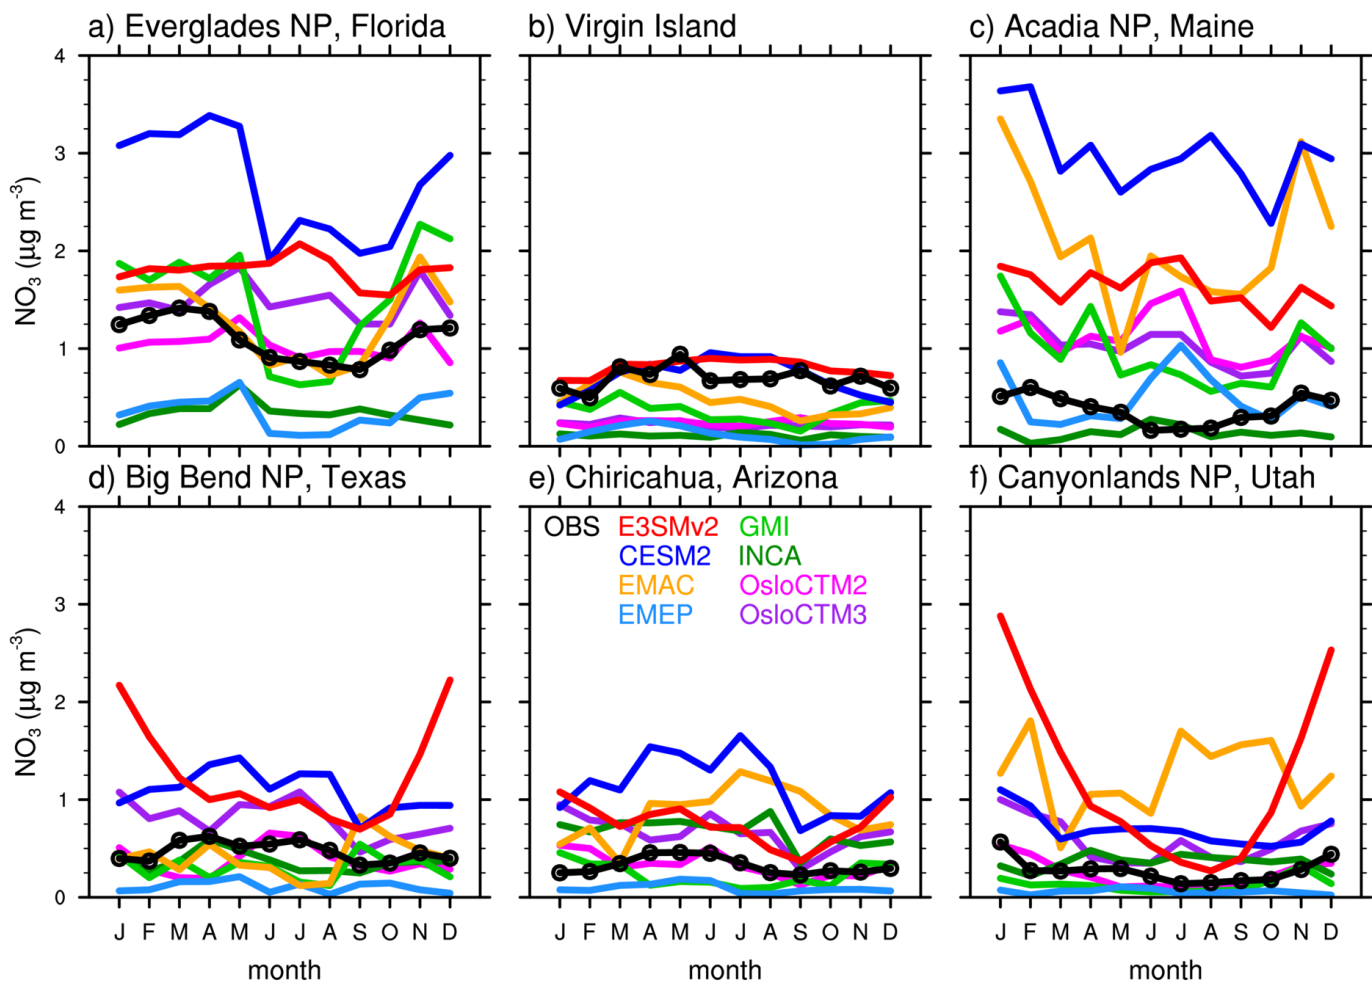

**Figure S9.** Same as Figure 7 but for nitrate surface concentrations ( $\mu\text{g m}^{-3}$ ).

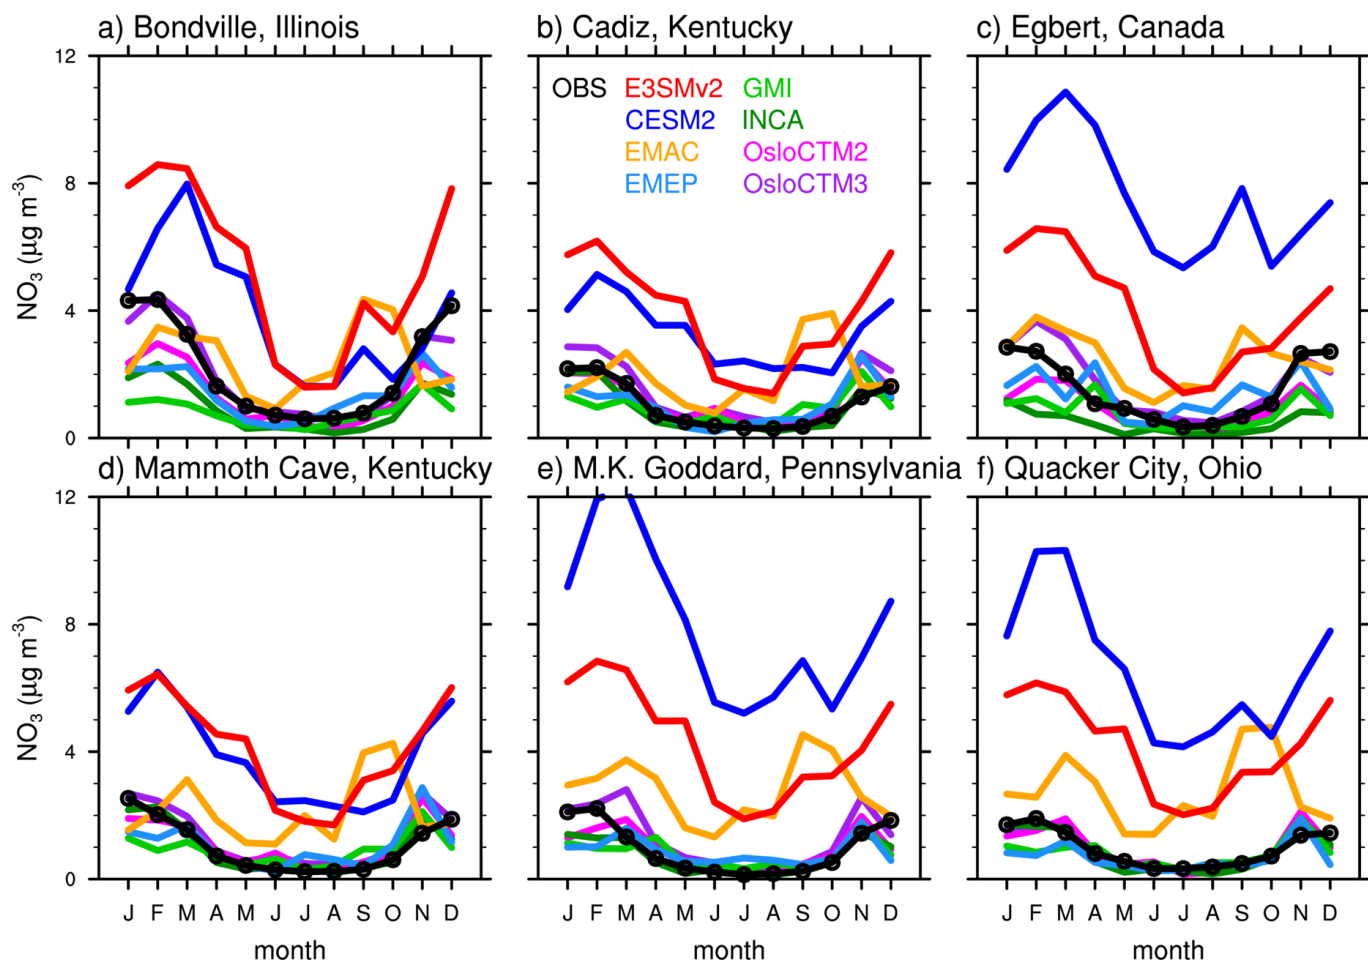

**Figure S10.** Same as Figure 8 but for nitrate surface concentrations ( $\mu\text{g m}^{-3}$ ).

127 **Table S1.** Global annual mean of dust emission, dust burden, sea salt emission, and sea salt burden.

| Model    | Dust emission (Tg a <sup>-1</sup> ) | Dust burden (Tg) | Sea salt emission (Tg a <sup>-1</sup> ) | Sea salt burden (Tg) |
|----------|-------------------------------------|------------------|-----------------------------------------|----------------------|
| E3SMv2   | 4619                                | 28.2             | 2148                                    | 4.74                 |
| CESM2    | 2018                                | 24.8             | 2987                                    | 6.88                 |
| GMI      | 1960                                | 16.9             | 4600                                    | 4.57                 |
| INCA     | 1075                                | 15.6             | 24892                                   | 22.5                 |
| OsloCTM2 | N/A                                 | 17.6             | N/A                                     | 6.12                 |
| OsloCTM3 | N/A                                 | 22.0             | N/A                                     | 5.92                 |

128

129

130

131

132

133

134

135

136

137

138

139

140

141
